# Supplementary material
Source: publisher site journal article supplement (https://www.dovepress.com/get_supplementary_file.php?f=499001.docx)
Supplement: Supplementary file 1 [file get_supplementary_file.php]

**Appendix 1.** The interview guide

Thank you for participating in this research study. We are interested in your view on leadership and your opinions on the Early Career Women’s Leadership program.

We expect this interview to take around 30 minutes. Participation is voluntary. We are grateful for your time. Unfortunately, we cannot provide you with any compensation for your participation.

Before we begin, as part of this research, we request your permission to create and use video and audio recordings of this interview. Recordings will not be used for advertising or non-study related purposes.

You should know that:

- You may request that the recording be stopped at any time.
- If you agree to allow the recording and then change your mind, you may ask us to destroy that imaging/recording. If the imaging/recording has had all identifiers removed, we may not be able to do this.
- We will only use these recording for the purposes of this research.

Do you have any questions about this?

Is it ok to record this interview?

*If yes,* Thank you, I will begin recording now [hit “Record”]

1. Thinking about your work-life integration and well-being, what do you feel is going well?

*Possible probes:*

What things do you do to help with your work-life integration and well-being?

What supports do you have to help with you work-life integration and well-being?

2. Where do you wish you had more support to help with your work-life integration and well-being?

*Transition statement:* I would like to move now to focus more specifically on leadership.

3. If you are considering applying for leadership positions in the future, what types of positions are most appealing to you?

3a. What is it about those positions that appeal to you?

Or… if you don’t want to apply for leadership positions in the future, why?

4. As you consider how to advance your career and pursue leadership positions, what values are most important to you?

*Possible probes:*

Values related to work

Values related to your personal life/family

5. If you received a leadership position, what would you need to succeed?

*Possible probes:*

What would be needed at work

What would be needed in your personal life

6. Have you ever applied to a leadership position?

6a. If you have, can you tell me about that (the leadership position)?

6b. Why do you think you received/did not receive the position?

7. Please describe one or two people who have affected your career goals?  (*note: add only if needed: This can be a personal connection for any length of time, a sponsor, a mentor, etc.)*

*Possible probe:*

What about this relationship(s) was so meaningful to you?

8. How have women leaders influenced you?

*Possible probes:*

How have the values of women leaders you know/have met compared to your values?

How have these leaders influenced your beliefs or desires regarding leadership positions?

9. Overall, how do you think being a woman influences your ability to advance your career? To become a leader?

*Possible probes:*

In what ways might being a woman provide you with an advantage?

In what ways might being a woman be a disadvantage?

10. Thank you for sharing your experiences and perceptions regarding leadership. How did your perceptions on pursuing career advancement or promotion change during the Early Career Women’s Leadership program?

*Possible probes:*

Were there particular sessions that affected you? Why?

11. How can the program be improved?

*Possible probes:*

Are there other topics that you wished the program included?

Any other types of activities that would have been helpful to you?

12. Is there anything else you think is important that we have not already discussed?

Thank you for your time. We’ll stop the recording.

If you have any questions or want to talk further, please feel free to contact Dr. Jenny Lee at [jennifer.lee@jhmi.edu](mailto:jennifer.lee@jhmi.edu) in the Office of Women in Science and Medicine.
